# Supplementary material for: Identification of Novel Protein-Protein Interactions of Yersinia pestis Type III Secretion System by Yeast Two Hybrid System
Source: PLoS One. 2013 Jan 22;8(1):e54121. doi: 10.1371/journal.pone.0054121 (PMC3551969; doi:10.1371/journal.pone.0054121)
Supplement: Table S1 — 57 target genes encoded in pCD1 plasmid according to the genome annotation of Y. pestis CO92. (PDF) [file pone.0054121.s002.pdf]

**Table S1. 57 target genes encoded in pCD1 plasmid according to the genome annotation of *Y. pestis* CO92**

| Gene ID   | Length aa | Gene name               | product                                                    |
|-----------|-----------|-------------------------|------------------------------------------------------------|
| YPCD1.05c | 130       | <i>yer A,sycE</i>       | putative yopE chaperone sycE, yerA, yopE targeting protein |
| YPCD1.06  | 219       | <i>yopE</i>             | putative outer membrane virulence protein yopE             |
| YPCD1.07  | 98        |                         | hypothetical protein                                       |
| YPCD1.08c | 99        |                         | hypothetical protein                                       |
| YPCD1.09c | 91        |                         | hypothetical protein                                       |
| YPCD1.15c | 152       |                         | hypothetical protein                                       |
| YPCD1.16c | 107       |                         | hypothetical protein                                       |
| YPCD1.19c | 182       | <i>yopQ,yopK</i>        | putative virulence determinant protein, yopK, yopQ         |
| YPCD1.20  | 322       | <i>yopT</i>             | putative cytotoxic effector protein, yopT                  |
| YPCD1.21  | 132       | <i>sycT</i>             | putative yopT chaperone, sycT                              |
| YPCD1.22c | 129       |                         | hypothetical protein , Y0063                               |
| YPCD1.23  | 139       |                         | hypothetical protein, Y0062                                |
| YPCD1.26c | 409       | <i>yopM</i>             | probable targeted effector protein , yopM                  |
| YPCD1.28c | 306       | <i>yopD</i>             | putative Yop negative regulation/targeting component, yopD |
| YPCD1.29c | 401       | <i>yopB</i>             | putative Yop targeting protein, yopB                       |
| YPCD1.30c | 168       | <i>sycD,lcrH</i>        | putative yopB/yopD chaperone, lcrH, sycD                   |
| YPCD1.31c | 326       | <i>lcrV</i>             | putative V antigen, antihost protein/regulator, lcrV       |
| YPCD1.32c | 95        | <i>lcrG</i>             | putative Yop regulator, lcrG                               |
| YPCD1.33c | 146       | <i>lcrR</i>             | hypothetical protein lcrR, lcrR                            |
| YPCD1.34c | 704       | <i>lcrD</i>             | putative membrane-bound Yop protein, lcrD, yscV            |
| YPCD1.35c | 114       | <i>yscY</i>             | putative type III secretion protein, yscY                  |
| YPCD1.36c | 122       | <i>yscX</i>             | putative type III secretion protein, yscX                  |
| YPCD1.37c | 123       | <i>sycN</i>             | putative type III secretion protein, sycN                  |
| YPCD1.38c | 92        | <i>tyeA</i>             | putative Yop secretion and targeting protein, tyeA         |
| YPCD1.39c | 293       | <i>lcrE</i>             | putative membrane-bound Yop targeting protein, yopN, lcrE  |
| YPCD1.40  | 439       | <i>yscN</i>             | putative Yops secretion ATP synthase, yscN                 |
| YPCD1.41  | 154       | <i>yscO</i>             | putative type III secretion protein, yscO                  |
| YPCD1.42  | 455       | <i>yscP</i>             | putative type III secretion protein, yscP                  |
| YPCD1.43  | 307       | <i>yscQ</i>             | putative type III secretion protein, yscQ                  |
| YPCD1.44  | 217       | <i>yscR</i>             | putative Yop secretion membrane protein, yscR              |
| YPCD1.45  | 88        | <i>yscS</i>             | putative type III secretion protein, yscS                  |
| YPCD1.46  | 261       | <i>yscT</i>             | putative type III secretion protein, yscT                  |
| YPCD1.47  | 354       | <i>yscU</i>             | putative type III secretion protein, yscU                  |
| YPCD1.48  | 131       | <i>yscW</i>             | putative Yop targeting lipoprotein, virG                   |
| YPCD1.49  | 271       | <i>lcrF,virF</i>        | putative thermoregulatory protein, lcrF, virF              |
| YPCD1.50  | 32        | <i>yscA</i>             | hypothetical protein, yscA                                 |
| YPCD1.51  | 137       | <i>yscB</i>             | hypothetical protein, yscB                                 |
| YPCD1.52  | 607       | <i>yscC</i>             | putative type III secretion protein, yscC                  |
| YPCD1.53  | 419       | <i>yscD</i>             | putative type III secretion protein, yscD                  |
| YPCD1.54  | 66        | <i>yscE</i>             | putative type III secretion protein, yscE                  |
| YPCD1.55  | 87        | <i>yscF</i>             | putative type III secretion protein, yscF                  |
| YPCD1.56  | 115       | <i>yscG</i>             | putative type III secretion protein, yscG                  |
| YPCD1.57  | 165       | <i>yscH, yopR, lcrP</i> | putative type III secretion protein, yscH, yopR, lcrP      |
| YPCD1.58  | 115       | <i>yscI, lcrO</i>       | putative type III secretion protein, yscI, lcrO            |
| YPCD1.59  | 244       | <i>yscJ, ylpB</i>       | putative type III secretion lipoprotein, yscJ, ylpB        |
| YPCD1.60  | 209       | <i>yscK</i>             | putative type III secretion protein, yscK                  |
| YPCD1.61  | 221       | <i>yscL</i>             | putative type III secretion protein, yscL                  |
| YPCD1.62  | 115       | <i>yscM, lcrQ</i>       | putative type III secretion regulatory protein, yscM, lcrQ |

|           |     |                   |                                                          |
|-----------|-----|-------------------|----------------------------------------------------------|
| YPCD1.67c | 468 | <i>yopH</i>       | putative protein-tyrosine phosphatase Yop effector, yopH |
| YPCD1.68c | 68  |                   | conserved hypothetical protein                           |
| YPCD1.71c | 288 | <i>yopP, yopJ</i> | putative targeted effector protein, yopP, yopJ           |
| YPCD1.72c | 732 | <i>ypkA</i>       | putative targeted effector protein kinase, ypkA          |
| YPCD1.73c | 149 |                   | hypothetical protein                                     |
| YPCD1.82c | 135 |                   | hypothetical protein                                     |
| YPCD1.83c | 107 |                   | hypothetical protein                                     |
| YPCD1.91  | 109 |                   | hypothetical protein                                     |
| YPCD1.95c | 141 | <i>sych</i>       | putative yopH targeting protein, sych                    |

---
