# Supplementary material for: Identification of Novel Protein-Protein Interactions of Yersinia pestis Type III Secretion System by Yeast Two Hybrid System
Source: PLoS One. 2013 Jan 22;8(1):e54121. doi: 10.1371/journal.pone.0054121 (PMC3551969; doi:10.1371/journal.pone.0054121)
Supplement: Table S2 — Known interactions of Y. pestis T3SS components reported in literatures. (PDF) [file pone.0054121.s003.pdf]

**Table S2. Known interactions of *Y. pestis* T3SS components reported in literatures.**

| Gene ID        | Protein name      | Gene ID   | Protein name | References                      | Method                                                                    |
|----------------|-------------------|-----------|--------------|---------------------------------|---------------------------------------------------------------------------|
| YPCD1.05c      | SycE              | YPCD1.06  | YopE         | Wattiau and Cornelis 1993       | Affinity blot                                                             |
| YPCD1.95c      | SycH              | YPCD1.67c | YopH         | Wattiau, Bernier et al. 1994    | Affinity blot                                                             |
| YPCD1.30c      | SycD/LcrH         | YPCD1.28c | YopD         | Wattiau, Bernier et al. 1994    | Affinity blot                                                             |
| YPCD1.32c      | LcrG              | YPCD1.31c | LcrV         | Nilles, Williams et al. 1997    | cross-linking and copurification                                          |
| YPCD1.37c      | SycN              | YPCD1.51  | YscB         | Day and Plano 1998              | Protein cross-linking, immunoprecipitation, and yeast two-hybrid analyses |
| YPCD1.37c/1.51 | SycN/YscB complex | YPCD1.39c | YopN         | Day and Plano 1998              | Y3H                                                                       |
| YPCD1.38c      | TyeA              | YPCD1.39c | YopN         | Iriarte, Sory et al. 1998       | Copurification                                                            |
| YPCD1.38c      | TyeA              | YPCD1.28c | YopD         | Iriarte, Sory et al. 1998       | Copurification                                                            |
| YPCD1.31c      | LcrV              | YPCD1.29c | YopB         | Sarker, Neyt et al. 1998        | Copurification                                                            |
| YPCD1.31c      | LcrV              | YPCD1.28c | YopD         | Sarker, Neyt et al. 1998        | Copurification                                                            |
| YPCD1.28c      | YopD              | YPCD1.06  | YopE         | Hartland 1998                   | Affinity blot                                                             |
| YPCD1.21       | SycT              | YPCD1.20  | YopT         | Iriarte and Cornelis 1998       | Biochemical method                                                        |
| YPCD1.30c      | SycD/LcrH         | YPCD1.29c | YopB         | Neyt and Cornelis 1999          | GST pull down                                                             |
| YPCD1.29c      | YopB              | YPCD1.28c | YopD         | Neyt and Cornelis 1999          | GST pull down                                                             |
| YPCD1.56       | YscG              | YPCD1.54  | YscE         | Day, Guller et al. 2000         | Y2H, biochemical method                                                   |
| YPCD1.36c      | YscX              | YPCD1.35c | YscY         | Day and Plano 2000              | Y2H, affinity blot                                                        |
| YPCD1.40       | YscN              | YPCD1.61  | YscL         | Jackson 2000                    | Y2H                                                                       |
| YPCD1.61       | YscL              | YPCD1.43  | YscQ         | Jackson 2000                    | Y2H                                                                       |
| YPCD1.60       | YscK              | YPCD1.43  | YscQ         | Jackson 2000                    | Y2H                                                                       |
| YPCD1.05c      | SycE              | YPCD1.05c | SycE         | Wattiau and Cornelis 1993       | Crystal structure                                                         |
| YPCD1.35c      | YscY              | YPCD1.30c | SycD/LcrH    | Francis, Lloyd et al. 2001      | Y2H                                                                       |
| YPCD1.95c      | SycH              | YPCD1.95c | SycH         | Neumayer, Groll et al. 2004     | Crystal structure and biochemical method                                  |
| YPCD1.62       | LcrQ/YscM         | YPCD1.95c | SycH         | Cambronne and Sorg 2004         | Gel filtration chromatography                                             |
| YPCD1.62       | LcrQ/YscM         | YPCD1.05c | SycE         | Swietnicki, O'Brien et al. 2004 | SPR                                                                       |
| YPCD1.05c      | SycE              | YPCD1.54  | YscE         | Swietnicki, O'Brien et al. 2004 | SPR/MS                                                                    |
| YPCD1.95c      | SycH              | YPCD1.19c | YopK         | Swietnicki, O'Brien et al. 2004 | SPR/MS                                                                    |
| YPCD1.30c      | SycD/LcrH         | YPCD1.54  | YscE         | Swietnicki, O'Brien et al. 2004 | SPR/MS                                                                    |
| YPCD1.30c      | SycD/LcrH         | YPCD1.38c | TyeA         | Swietnicki, O'Brien et al. 2004 | SPR/MS                                                                    |
| YPCD1.38c      | TyeA              | YPCD1.19c | YopK         | Swietnicki, O'Brien et al. 2004 | SPR/MS                                                                    |
| YPCD1.38c      | TyeA              | YPCD1.67c | YopH/N       | Swietnicki, O'Brien et al. 2004 | SPR/MS                                                                    |
| YPCD1.67c      | yopH/N            | YPCD1.19c | YopK         | Swietnicki, O'Brien et al. 2004 | SPR/MS                                                                    |
| YPCD1.62       | YscM1/N-te        | YPCD1.67c | YopH/N       | Swietnicki, O'Brien et al. 2004 | MS                                                                        |
| YPCD1.54       | YscE              | YPCD1.54  | YscE         | Phan, Austin et al. 2005        | Crystal structure                                                         |
| YPCD1.21       | SycT              | YPCD1.21  | SycT         | Buttner, Cornelis et al. 2005   | Crystal structure                                                         |
| YPCD1.73c      | SycO              | YPCD1.72c | YpkA         | Letzelter, Sorg et al. 2006     | Size-exclusion chromatography                                             |
| YPCD1.73c      | SycO              | YPCD1.62  | YscM1        | Dittmann, Schmid et al. 2007    | Native gel electrophoresis                                                |

|           |      |           |      |                               |                                                      |
|-----------|------|-----------|------|-------------------------------|------------------------------------------------------|
| YPCD1.73c | SycO | YPCD1.73c | SycO | Dittmann, Schmid et al. 2007  | Analytical gel filtration and chemical cross-linking |
| YPCD1.55  | YscF | YPCD1.56  | YscG | Ping Sun, Joseph E. Tropea et | Crystal structure                                    |
| YPCD1.55  | YscF | YPCD1.54  | YscE | Ping Sun, Joseph E. Tropea et | Crystal structure                                    |

---

- Birtalan, S. and P. Ghosh (2001). "Structure of the *Yersinia* type III secretory system chaperone SycE." *Nat Struct Biol* **8**(11): 974-978.
- Buttner, C. R., G. R. Cornelis, et al. (2005). "Crystal structure of *Yersinia enterocolitica* type III secretion chaperone SycT." *Protein Sci* **14**(8): 1993-2002.
- Cambronne, E. D. and J. A. Sorg (2004). "Binding of SycH chaperone to YscM1 and YscM2 activates effector yop expression in *Yersinia enterocolitica*." *Journal of Bacteriology* **186**(3): 829-841.
- Day, J. B., I. Guller, et al. (2000). "*Yersinia pestis* YscG protein is a Syc-like chaperone that directly binds yscE." *Infection and Immunity* **68**(11): 6466-6471.
- Day, J. B. and G. V. Plano (1998). "A complex composed of SycN and YscB functions as a specific chaperone for YopN in *Yersinia pestis*." *Mol Microbiol* **30**(4): 777-788.
- Day, J. B. and G. V. Plano (2000). "The *Yersinia pestis* YscY protein directly binds YscX, a secreted component of the type III secretion machinery." *J Bacteriol* **182**(7): 1834-1843.
- Dittmann, S., A. Schmid, et al. (2007). "The *Yersinia enterocolitica* type three secretion chaperone SycO is integrated into the Yop regulatory network and binds to the Yop secretion protein YscM 1." *BMC Microbiology*
- Hartland, E. L. (1998). "In vitro association between the virulence proteins, YopD and YopE, of *Yersinia enterocolitica*." *FEMS Microbiology Letters* **162**: 207-213.
- Iriarte, M. and G. R. Cornelis (1998). "YopT, a new *Yersinia* Yop effector protein, affects the cytoskeleton of host cells." *Mol Microbiol* **29**(3): 915-929.
- Iriarte, M., M. P. Sory, et al. (1998). "TyeA, a protein involved in control of Yop release and in translocation of *Yersinia* Yop effectors." *The EMBO Journal* **17**(7): 1907-1918.
- Jackson, M. W. (2000). "Interactions between type III secretion apparatus components from *Yersinia pestis* detected using the yeast two - hybrid system." *FEMS Microbiology Letters* **186**: 85-90.
- Letzelter, M., I. Sorg, et al. (2006). "The discovery of SycO highlights a new function for type III secretion effector chaperones." *The EMBO Journal* **25**(13): 3223-3233.
- Neumayer, W., M. Groll, et al. (2004). "*Yersinia enterocolitica* type III secretion chaperone SycH. Recombinant expression, purification, characterisation, and crystallisation." *Protein Expr Purif* **35**(2): 237-247.
- Neyt, C. and G. R. Cornelis (1999). "Role of SycD, the chaperone of the *Yersinia* Yop translocators YopB and YopD." *Mol Microbiol* **31**(1): 143-156.
- Nilles, M. L., A. W. Williams, et al. (1997). "*Yersinia pestis* LcrV forms a stable complex with LcrG and may have a secretion-related regulatory role in the low-Ca<sup>2+</sup> response." *J Bacteriol* **179**(4): 1307-1316.
- Phan, J., B. P. Austin, et al. (2005). "Crystal structure of the *Yersinia* type III secretion protein YscE." *Protein Sci* **14**(10): 2759-2763.
- Ping Sun, Joseph E. Tropea, et al. (2008). "Structural characterization of the *Yersinia pestis* type III secretion system needle protein YscF in complex with its heterodimeric chaperone YscE/YscG." *Journal of Molecular*
- Sarker, M. R., C. Neyt, et al. (1998). "The *Yersinia* Yop virulon: LcrV is required for extrusion of the translocators YopB and YopD." *Journal of Bacteriology* **180**(5): 1207-1214.
- Swietnicki, W., S. O'Brien, et al. (2004). "Novel protein-protein interactions of the *Yersinia pestis* type III secretion system elucidated with a matrix analysis by surface plasmon resonance and mass spectrometry." *J Biol*
- Wattiau, P., B. Bernier, et al. (1994). "Individual chaperones required for Yop secretion by *Yersinia*." *Microbiology* **91**: 10493-10497.
- Wattiau, P. and G. R. Cornelis (1993). "SycE, a chaperone-like protein of *Yersinia enterocolitica* involved in the secretion of YopE." *Mol Microbiol* **8**(1): 123-131.
- Francis, M. S., S. A. Lloyd, et al. (2001). "The type III secretion chaperone LcrH co-operates with YopD to establish a negative , regulatory loop for control of Yop synthesis in *Yersinia pseudotuberculosis*." *Mol*
- Edqvist, P. J., J. Olsson, et al. (2003). "YscP and YscU regulate substrate specificity of the *Yersinia* type III secretion system." *J Bacteriol* **185**(7): 2259-2266.
