# Supplementary material for: Identification of Novel Protein-Protein Interactions of Yersinia pestis Type III Secretion System by Yeast Two Hybrid System
Source: PLoS One. 2013 Jan 22;8(1):e54121. doi: 10.1371/journal.pone.0054121 (PMC3551969; doi:10.1371/journal.pone.0054121)
Supplement: Table S3 — List of 19 Y. pestis T3SS proteins that were successfully cloned or expressed in this study. (PDF) [file pone.0054121.s004.pdf]

**Table S3. List of 19 *Y. pestis* T3SS proteins that were successfully cloned or expressed in this study.**

| Gene ID     | Protein name | Cloned | Soluble expressed | Tag Types |
|-------------|--------------|--------|-------------------|-----------|
| YpCD1.46    | YscT         | Y      | -                 |           |
| YpCD1.15c   | Hypothetical | Y      | -                 |           |
| YpCD1.34c-2 | LcrD         | Y      | -                 |           |
| YpCD1.16c   | Hypothetical | Y      | N                 |           |
| YpCD1.33c   | LcrR         | Y      | N                 |           |
| YpCD1.38c   | TyeA         | Y      | Y                 | His       |
| YpCD1.30    | SycD/LcrH    | Y      | Y                 | His       |
| YpCD1.55    | YscF         | Y      | Y                 | His       |
| YpCD1.56    | YscG         | Y      | Y                 | GST       |
| YpCD1.57    | YopR         | Y      | Y                 | His       |
| YpCD1.58    | YscI         | Y      | Y                 | GST       |
| YpCD1.38c   | TyeA         | Y      | Y                 | His       |
| YpCD1.39c   | YopN         | Y      | Y                 | His       |
| YpCD1.08c   | Hypothetical | Y      | Y                 | His       |
| YpCD1.09c   | Hypothetical | Y      | Y                 | GST       |
| YpCD1.73c   | SycO         | Y      | Y                 | His       |
| YpCD1.95c   | SycH         | Y      | Y                 | GST       |
| YpCD1.06    | YopE         | Y      | Y                 | His       |
| YpCD1.50    | YscA         | Y      | Y                 | His       |

Note:

“-” indicates protein that could not be expressed in this study.
