# Supplementary material for: Identification of Novel Protein-Protein Interactions of Yersinia pestis Type III Secretion System by Yeast Two Hybrid System
Source: PLoS One. 2013 Jan 22;8(1):e54121. doi: 10.1371/journal.pone.0054121 (PMC3551969; doi:10.1371/journal.pone.0054121)
Supplement: Table S4 — Twelve novel interactions identified in this study and the validation results by GST pull down assay were shown. (PDF) [file pone.0054121.s005.pdf]

**Table S4. Twelve novel interactions identified in this study and the validation results by GST pull down assay were shown.**

| Gene ID     | Protein name | Soluble expressed | Gene ID   | Protein name | Soluble expressed | GST-pull down |
|-------------|--------------|-------------------|-----------|--------------|-------------------|---------------|
| YpCD1.34c-2 | LcrD         | -                 | YpCD1.06  | YopE         | Y                 | NA            |
| YpCD1.15c   | Hypothetical | -                 | YpCD1.16c | Hypothetical | N                 | NA            |
| YpCD1.46    | YscT         | -                 | YpCD1.08c | Hypothetical | Y                 | NA            |
| YpCD1.5     | YscA         | Y                 | YpCD1.33c | LcrR         | N                 | NA            |
| YpCD1.33c   | LcrR         | N                 | YpCD1.73c | SycO         | Y                 | NA            |
| YpCD1.16c   | Hypothetical | N                 | YpCD1.38c | TyeA         | Y                 | NA            |
| YpCD1.56    | YscG         | Y                 | YpCD1.30  | SycD/LcrH    | Y                 | Y             |
| YpCD1.56    | YscG         | Y                 | YpCD1.38c | TyeA         | Y                 | Y             |
| YpCD1.58    | YscI         | Y                 | YpCD1.55  | YscF         | Y                 | Y             |
| YpCD1.09c   | Hypothetical | Y                 | YpCD1.39c | YopN         | Y                 | Y             |
| YpCD1.09c   | Hypothetical | Y                 | YpCD1.08c | Hypothetical | Y                 | N             |
| YpCD1.95c   | SycH         | Y                 | YpCD1.57  | YopR         | Y                 | N             |

Notes:

“-” indicates protein that could not be expressed in this study.

“NA” indicates interaction that could not be analyzed by GST-pull down assay.
